# Supplementary material for: Primary Bone Tumors: Patterns and Factors Associated With Malignancy Potential
Source: Research Square preprint supplement (doi:10.21203/rs.3.rs-6330513/v1), 2025-05-13
Supplement: Supplementary file 1 [file 3b8588352d75a2aaeed5ef7d.docx]

Table 1: Distribution of specific histologic diagnosis of bone tumors by sex (n=173)

| Histologic diagnosis | Sex | | |
| --- | --- | --- | --- |
| Female | Male | Total |
| N (%) | N (%) | N ( %) |
| ABC | 1 (33.3%) | 2 (66.7%) | 3 (100.0%) |
| Conventional chondrosarcoma | 0 (0.0%) | 4 (100.0%) | 4 (100.0%) |
| Cavernous hemangioma | 2 (66.7%) | 1 (33.3%) | 3 (100.0%) |
| Chondroblastoma | 2 (66.7%) | 1 (33.3%) | 3 (100.0%) |
| Chondroma | 0 (0.0%) | 2 (100.0%) | 2 (100.0%) |
| Synovial chondromatosis | 0 (0.0%) | 1 (100.0%) | 1 (100.0%) |
| Chondromyxoid fibroma | 2 (100.0%) | 0 (0.0%) | 2 (100.0%) |
| Chordoma | 1 (100.0%) | 0 (0.0%) | 1 (100.0%) |
| Conventional osteosarcoma | 1 (230.0%) | 28 (70.0%) | 40 (100.0%) |
| DFB | 0 (0.0%) | 1 (100.0%) | 1 (100.0%) |
| Enchondroma | 1 (25.0%) | 3 (75.0%) | 4 (100.0%) |
| Ewing sarcoma | 5 (29.4%) | 12 (70.6%) | 17 (100.0%) |
| Fibrous dysplasia | 10 (62.5%) | 6 (37.5%) | 16 (100.0%) |
| GCT | 8 (57.1%) | 6 (42.9%) | 14 (100.0%) |
| Intraosseous-lymphangioma | 1 (100.0%) | 0 (0.0%) | 1 (100.0%) |
| Low grade central osteosarcoma | 1 (100.0%) | 0 (0.0%) | 1 (100.0%) |
| Mesenchymal Chondrosarcoma | 1 (33.3%) | 2 (66.7%) | 3 (100.0%) |
| Ossifying fibroma | 14 (77.8%) | 4 (22.2%) | 18 (100.0%) |
| Osteiod osteoma | 1 (50.0%) | 1 (50.0%) | 2 (100.0%) |
| Osteoblastoma | 0 (0.0%) | 1 (100.0%) | 1 (100.0%) |
| Osteochondroma | 9 (33.3%) | 18 (6 6.7%) | 27 (100.0%) |
| Osteofibrous dysplasia | 1(100.0%) | 0 (0.0%) | 1 (100.0%) |
| Osteoma | 4 (80.0%) | 1 (20.0%) | 5 (100.0%) |
| Simple bone cyst | 0 (0.0%) | 1 (100.0%) | 1 (100.0%) |
| Subungual exostosis | 1 (100.0%) | 0 (0.0%) | 1 (100.0%) |
| Telangiectatic osteosarcoma | 0 (0.0%) | 1 (100.0%) | 1 (100.0%) |

ABC, Aneurysmal Bone Cyst; DFB, Desmoplastic Fibroblastoma of Bone; GCT, Giant Cell Tumor

Table 2: Distribution of bone tumors by age range (n=173)

| Histologic diagnosis | Age in years | | | | | | Total no of cases |
| --- | --- | --- | --- | --- | --- | --- | --- |
| 0-9 | 10-19 | 20-29 | 30-39 | 40-49 | 50+ |
| ABC | 0 (0%) | 0 (0%) | 2 (66.6%) | 1 (33.3%) | 0 (0%) | 0 (0%) | 3 (100%) |
| Cavernous hemangioma | 0 (0%) | 0 (0%) | 0 (0%) | 1 (33.3%) | 0 (0%) | 2 (66.6%) | 3 (100%) |
| Chondroblastoma | 0 (0%) | 2 (66.6%) | 0 (0%) | 0(0%) | 0 (0%) | 1 (33.3%) | 3 (100%) |
| Chondroma | 0 (0%) | 0 (0%) | 2 (100%) | 0 (0%) | 0 (0%) | 0 (0%) | 2 (100%) |
| Synovial chondromatosis | 0 (0%) | 0 (0%) | 0(0%) | 0 (0%) | 0 (0%) | 1 (100%) | 1 (100%) |
| Chondromyxoid fibroma | 1(50%) | 0 (0%) | 1 (50%) | 0 (0%) | 0 (0%) | 0 (0%) | 2 (100%) |
| Chordoma | 0 (0%) | 0 (0%) | 0 (0%) | 0 (0%) | 1 (100%) | 0 (0%) | 1 (100%) |
| Conventional chondrosarcoma | 0 (0%) | 0 (0%) | 1 (25%) | 1 (25%) | 1 (25%) | 1 (25%) | 4 (100%) |
| Conventional osteosarcoma | 1 (2.5%) | 23 (57.5%) | 10 (25%) | 1 (2.5%) | 2 (5%) | 3 (7.5%) | 40 (100%) |
| DFB | 0 (0%) | 0 (0%) | 1 (100%) | 0 (0%) | 0 (0%) | 0 (0%) | 1 (100%) |
| Enchondroma | 0 (0%) | 3 (75%) | 1 (25%) | 0 (0%) | 0 (0%) | 0 (0%) | 4 (100%) |
| Ewing sarcoma | 1 (5.9%) | 10 (58.8%) | 5 (29.4%) | 0 (0%) | 0 (0%) | 1 (5.9%) | 17 (100%) |
| Fibrous dysplasia | 2 (12.5%) | 7 (43.8%) | 7 (43.8%) | 0 (0%) | 0 (0%) | 0 (0%) | 16 (100%) |
| GCT | 0 (0%) | 2 (14.3%) | 5 (35.7%) | 4 (28.6%) | 3 (21.4%) | 0 (0%) | 14 (100%) |
| Lymphangioma | 0 (0%) | 1 (100%) | 0 (0%) | 0 (0%) | 0 (0%) | 0 (0%) | 1 (100%) |
| Low grade central osteosarcoma | 0 (0%) | 0 (0%) | 0 (0%) | 1 (100%) | 0 (0%) | 0 (0%) | 1 (100%) |
| Mesenchymal chondrosarcoma | 0 (0%) | 0 (0%) | 0 (0%) | 3 (100%) | 0 (0%) | 0 (0%) | 3 (100%) |
| Ossifying fibroma | 3 (16.7%) | 5 (27.8%) | 4 (22.2%) | 4 (22.2%) | 1 (5.6%) | 1 (5.6%) | 18 (100%) |
| Osteiod osteoma | 0 (0%) | 1 (50%) | 1 (50%) | 0 (0%) | 0 (0%) | 0 (0%) | 2 (100%) |
| Osteoblastoma | 0 (0%) | 1 (100%) | 0 (0%) | 0 (0%) | 0 (0%) | 0 (0%) | 1 (100%) |
| Osteochondroma | 1 (3.7%) | 11 (40.7%) | 11 (40.7%) | 3 (11.1%) | 1 (3.7%) | 0 (0%) | 27 (100%) |
| Osteofibrous dysplasia | 0 (0%) | 1 (100%) | 0 (0%) | 0 (0%) | 0 (0%) | 0 (0%) | 1 (100%) |
| Osteoma | 0 (0%) | 0 (0%) | 2 (40%) | 0 (0%) | 3 (60%) | 0 (0%) | 5 (100%) |
| Simple bone cyst | 1 (100%) | 0 (0%) | 0 (0%) | 0 (0%) | 0 (0%) | 0 (0%) | 1 (100%) |
| Subungual exostosis | 0 (0%) | 1 (100%) | 0 (0%) | 0 (0%) | 0 (0%) | 0 (0%) | 1 (100%) |
| Telangiectatic osteosarcoma | 0 (0%) | 1 (100%) | 0 (0%) | 0 (0%) | 0 (0%) | 0 (0%) | 1 (100%) |

ABC, Aneurysmal Bone Cyst; DFB, Desmoplastic Fibroblastoma of Bone; GCT, Giant Cell Tumor

**Table 3: Distribution based on histologic differentiation (n=173)**

| Histologic differentiation groups  (no of cases, (% from total)) | Specific tumors in the group | Number (%) in the group) |
| --- | --- | --- |
| Bone-forming tumors  (50, (28.9%)) | Conventional Osteosarcoma | 40 (80%) |
| Osteoma | 5 (10%) |
| Osteoid Osteoma | 2 (4%) |
| Telangiectatic Osteosarcoma | 1 (2%) |
| Low Grade Central Osteosarcoma | 1 (2%) |
| Osteoblastoma | 1 (2%) |
| Cartilage forming tumors  (47, (27.2%)) | Osteochondroma | 27 (57.4%) |
| Conventional Chondrosarcoma | 4 (8.5%) |
| Enchondroma | 4 (8.5%) |
| Mesenchymal Chondrosarcoma | 3 (6.8%) |
| Chondroblastoma | 3 (6.8%) |
| Chondroma | 2 (4.3%) |
| Chondromyxoid Fibroma | 2 (4.3%) |
| Synovial Chondromatosis | 1 (2.1%) |
| Subungual Exostoses | 1 (2.1%) |
| Osteoclastic giant cell-rich tumors  (17, (9.8%)) | GCT of bone | 14 (82.3%) |
| ABC | 3 (17.6%) |
| Vascular tumors  (4, (2.3%)) | Cavernous hemangioma | 3 (75%) |
| Intraosseous lymphangioma | 1 (25%) |
| Other mesenchymal tumors  (55, (31.8%)) | Ossifying fibroma | 18 (32.7%). |
| Ewing sarcoma | 17 (30.95%) |
| Fibrous dysplasia | 16 (29.0%) |
| DFB | 1 (1.8%) |
| Osteofibrous dysplasia | 1 (1.8%) |
| Chordoma | 1 (1.8%) |
| Simple bone cyst | 1 (1.8%) |

GCT, Giant Cell Tumor; ABC, Aneurysmal Bone Cyst; DFB, Desmoplastic Fibroblastoma of Bone

Table 4: Distribution of cartilage forming and osteoclastic giant cell rich tumors by anatomic sites (n=64)

| Histologic diagnosis | | Anatomic site | | | | | | | | Total no of cases |
| --- | --- | --- | --- | --- | --- | --- | --- | --- | --- | --- |
| Craniofacial | Hip and pelvisa | Jaw | Kneeb | Lower limb | Shoulderc | Trunkd | Upper limb |
| Cartilage forming | Conventional chondrosarcoma | 1 (25%) | 0 (0%) | 2 (50%) | 1 (25%) | 0 (0%) | 0 (0%) | 0 (0%) | 0 (0%) | 4 (100%) |
| Chondroblastoma | 0 (0%) | 0 (0%) | 0 (0%) | 1 (33.3%) | 0 (0%) | 1 (33.3%) | 0 (0%) | 1 (33.3%) | 3 (100%) |
| Chondroma | 0 (0%) | 0 (0%) | 0 (0%) | 0 (0%) | 1 (50%) | 0 (0%) | 0 (0%) | 1 (50%) | 2 (100%) |
| Synovial chondromatosis | 0 (0%) | 0 (0%) | 0 (0%) | 1 (100%) | 0 (0%) | 0 (0%) | 0 (0%) | 0 (0%) | 1 (100%) |
| Chondromyxoid fibroma | 0 (0%) | 0 (0%) | 1 (50%) | 1 (50%) | 0 (0%) | 0 (0%) | 0 (0%) | 0 (0%) | 2 (100%) |
| Enchondroma | 0 (0%) | 0 (0%) | 0 (0%) | 0 (0%) | 1 (25%) | 0 (0%) | 0 (0%) | 3 (75%) | 4 (100%) |
| Mesenchymal chondrosarcoma | 0 (0%) | 0 (0%) | 3 (100%) | 0 (0%) | 0 (0%) | 0 (0%) | 0 (0%) | 0 (0%) | 3 (100%) |
| Osteochondroma | 1 (3.7%) | 4 (14.8%) | 0 (0%) | 9 (33.3%) | 6 (22.2%) | 3 (11.1%) | 1 (3.7%) | 3 (11.1%) | 27 (100%) |
| Subungual exostosis | 0 (0%) | 0 (0%) | 0 (0%) | 0 (0%) | 0 (0%) | 0 (0%) | 0 (0%) | 1 (100%) | 1 (100%) |
| OGCR | ABC | 0 (0%) | 0 (0%) | 1 (33.3%) | 1 (33.3%) | 1 (33.3%) | 0 (0%) | 0 (0%) | 0 (0%) | 3 (100%) |
| GCT | 0 (0%) | 0 (0%) | 0 (0%) | 6 (42.9%) | 2 (14.3%) | 1 (7.1%) | 0 (0%) | 5 (35.7%) | 14 (100%) |

OGCR- Osteoclastic giant cell rich; ABC,; GCT,; aHip and pelvis include pelvic bones and proximal femur; bKnee includes distal femur, proximal tibia and proximal fibula; cShoulder includes proximal humerus, clavicle and scapula; dTrunk includes vertebrae, ribs, sternum

Table 5: Distribution of the bone forming, vascular and other bone tumors by anatomic sites (n=109)

| Histologic diagnosis | | Anatomic site | | | | | | | | Total no of cases |
| --- | --- | --- | --- | --- | --- | --- | --- | --- | --- | --- |
| Craniofacial | Hip and pelvisa | Jaw | Kneeb | Lower limb | Shoulderc | Trunkd | Upper limb |
| Bone forming | Conventional osteosarcoma | 0 (0%) | 4 (10%) | 3 (7.5%) | 24 (60%) | 3 (7.5%) | 4 (10%) | 0 (0%) | 2 (5%) | 40 (100%) |
| Low grade central osteosarcoma | 0 (0%) | 0 (0%) | 0 (0%) | 1 (100%) | 0 (0%) | 0 (0%) | 0 (0%) | 0 (0%) | 1 (100%) |
| Osteiod osteoma | 1 (50%) | 0 (0%) | 0 (0%) | 1 (50%) | 0 (0%) | 0 (0%) | 0 (0%) | 0 (0%) | 2 (100%) |
| Osteoblastoma | 0 (0%) | 0 (0%) | 0 (0%) | 0 (0%) | 0 (0%) | 0 (0%) | 1 (100%) | 0 (0%) | 1 (100%) |
| Osteoma | 1 (20%) | 0 (0%) | 4 (80%) | 0 (0%) | 0 (0%) | 0 (0%) | 0 (0%) | 0 (0%) | 5 (100%) |
| Telangiectatic osteosarcoma | 0 (0%) | 0 (0%) | 0 (0%) | 0 (0%) | 0 (0%) | 1 (100%) | 0 (0%) | 0 (0%) | 1 (100%) |
| Others | Chordoma | 0 (0%) | 0 (0%) | 0 (0%) | 0 (0%) | 0 (0%) | 0 (0%) | 1 (100%) | 0 (0%) | 1 (100%) |
| DFB | 0 (0%) | 0 (0%) | 0 (0%) | 0 (0%) | 0 (0%) | 1 (100%) | 0 (0%) | 0 (0%) | 1 (100%) |
| Ewing sarcoma | 0 (0%) | 3 (17.6%) | 0 (0%) | 7 (41.2%) | 2 (11.8%) | 1 (5.9%) | 0 (0%) | 4 (23.5%) | 17 (100%) |
| Fibrous dysplasia | 6 (37.5%) | 0 (0%) | 9 (56.3%) | 1 (6.3%) | 0 (0%) | 0 (0%) | 0 (0%) | 0 (0%) | 16 (100%) |
| Ossifying fibroma | 6 (33.3%) | 0 (0%) | 12 (66.7%) | 0 (0%) | 0 (0%) | 0 (0%) | 0 (0%) | 0 (0%) | 18 (100%) |
| Osteofibrous dysplasia | 0 (0%) | 0 (0%) | 1 (100%) | 0 (0%) | 0 (0%) | 0 (0%) | 0 (0%) | 0 (0%) | 1 (100%) |
| Simple bone cyst | 0 (0%) | 1 (100%) | 0 (0%) | 0 (0%) | 0 (0%) | 0 (0%) | 0 (0%) | 0 (0%) | 1 (100%) |
| Vascular | Cavernous hemangioma | 2 (66.7%) | 0 (0%) | 0 (0%) | 0 (0%) | 0 (0%) | 0 (0%) | 0 (0%) | 1 (33.3%) | 3 (100%) |
| Lymphangioma | 0 (0%) | 1 (100%) | 0 (0%) | 0 (0%) | 0 (0%) | 0 (0%) | 0 (0%) | 0 (0%) | 1 (100%) |

DFB, Desmoplastic Fibroblastoma of Bone; aHip and pelvis include pelvic bones and proximal femur; bKnee includes distal femur, proximal tibia and proximal fibula; cShoulder includes proximal humerus, clavicle and scapula; dTrunk includes vertebrae, ribs, sternum

Table 6: Bivariate and Multivariate logistic regression analysis of factors associated with malignant biological nature of bone tumors

| Variables | Categories | Biological nature | | Crude Odds ratio (95% CI) | Adjusted Odds ratio (95% CI) |
| --- | --- | --- | --- | --- | --- |
| Non-malignant  N (%) | Malignant  N (%) |
| Age | 0-19 | 43 (40.6%) | 36 (53.7%) | 1.09 (0.43-2.77) | 0.36 (0.10-1.70) |
| 20-49 | 50 (47.2%) | 21 (31.3%) | 0.55 (0.21-1.44)* | 0.19 (0.05-0.78)** |
| >50 | 13 (12.3%) | 10 (14.9%) | R | R |
| Sex | Male | 49 (46.2%) | 47 (29.9%) | 2.73 (1.43-5.23)* | 3.81 (1.49-9.73)** |
| Female | 57 (53.8%) | 20 (70.1%) | R | R |
| Duration of clinical symptoms | 0-6 months | 15 (14.2%) | 30 (44.8%) | 33.50 (10.25-109.46)* | 43.09 (38.72-47.38)  ** |
| 7-12 months | 24 (22.6%) | 33 (49.3%) | 23.00 (7.38-71.84)* | 36.20 (32.73-41.37)  ** |
| >12month | 67 (63.2%) | 4 (6.0%) | R | R |
| Site of the tumor | Craniofacial bone | 17 (16.0%) | 1 (1.5%) | 0.15 (0.02-1.37)* | 0.06 (0.00-1.04) |
| Hip and pelvis | 5 (4.7%) | 7 (10.4%) | 3.50 (0.79-15.50)* | 2.10 (0.32-13.92) |
| Knee | 21 (19.8%) | 33 (49.6%) | 3.93 (1.32-11.73)* | 2.13 (0.54-8.41) |
| Shoulder girdle | 6 (5.7%) | 6 (9.0%) | 2.50 (0.57-10.93)* | 2.28 (0.340-15.39) |
| Upper extremity | 15 (14.2%) | 6 (9.0) | R | R |

*Significant association at P<0.25; **significant association at P<0.05; R, Reference category
